# Supplementary material for: Psychological distress of healthcare workers in Québec (Canada) during the second and the third pandemic waves
Source: bioRxiv or medRxiv preprint supplement (doi:10.1101/2021.10.19.21265175), 2021-10-22
Supplement: Supplementary file [file media-1.pdf]

**Supplementary Digital Content - Annex.** Questions in the survey for the items and variables included in the study and construction of indicators (psychosocial risks of work and psychological distress)

| Items and Questions                                                                                                                                        | Choice of answers and score assigned to each answer                | Construction of indicators                                                                                                                                                       |
|------------------------------------------------------------------------------------------------------------------------------------------------------------|--------------------------------------------------------------------|----------------------------------------------------------------------------------------------------------------------------------------------------------------------------------|
| <b>1. Psychosocial risks of work</b>                                                                                                                       |                                                                    |                                                                                                                                                                                  |
| <i>The questions below relate to your current MAIN employment and the relationships with your professional environment.</i>                                |                                                                    |                                                                                                                                                                                  |
| <i>A. I'm asked to do an excessive amount of work.</i>                                                                                                     | Strongly disagree (0); Disagree (0); Agree (1); Strongly agree (2) | <b>Psychological demands.</b><br>Sum of responses to items A to E (scale from 0 to 10)<br>Low level: score = 0 or 1<br>Moderate: score = 2 or 3<br>High level: score = 4 or more |
| <i>B. I receive contradictory requests (opposite) from others; these requests can come from different groups: supervisors, colleagues, customers, etc.</i> | Strongly disagree (0); Disagree (0); Agree (1); Strongly agree (2) |                                                                                                                                                                                  |
| <i>C. My job requires me to work very fast.</i>                                                                                                            | Strongly disagree (0); Disagree (0); Agree (1); Strongly agree (2) |                                                                                                                                                                                  |
| <i>D. I have enough time to do my work.</i>                                                                                                                | Strongly disagree (0); Disagree (0); Agree (1); Strongly agree (2) |                                                                                                                                                                                  |
| <i>E. My job requires me to work very hard (mental or physical requirements).</i>                                                                          | Strongly disagree (0); Disagree (0); Agree (1); Strongly agree (2) |                                                                                                                                                                                  |
| <i>F. I experience many interruptions and distractions while performing my tasks.</i>                                                                      | Strongly disagree (0); Disagree (0); Agree (1); Strongly agree (2) |                                                                                                                                                                                  |
| <i>G. I have the freedom to decide how I do my job.</i>                                                                                                    | Strongly disagree (0); Disagree (0); Agree (1); Strongly agree (2) | <b>Decision-making authority.</b><br>Sum of responses to items G and H (scale from 0 to 2)<br>High level: score = 2<br>Low or moderate level: score 0 or 1                       |
| <i>H. I can influence how things are done at my job.</i>                                                                                                   | Strongly disagree (0); Disagree (0); Agree (1); Strongly agree (2) |                                                                                                                                                                                  |
| <i>I. My job security is poor.</i>                                                                                                                         | Strongly disagree (0); Disagree (0); Agree (1); Strongly agree (2) | <b>Reward.</b><br>Sum of responses to items I to L (scale from 0 to 8)<br>High level: score = 0<br>Moderate: score = 1 or 2<br>Low level: score = 3 or more                      |
| <i>J. Given all my efforts and accomplishments, I receive the respect and esteem that I deserve at my job.</i>                                             | Strongly disagree (0); Disagree (0); Agree (1); Strongly agree (2) |                                                                                                                                                                                  |
| <i>K. Given all my efforts and accomplishments, my promotion prospects are satisfactory.</i>                                                               | Strongly disagree (0); Disagree (0); Agree (1); Strongly agree (2) |                                                                                                                                                                                  |
| <i>L. Given all my efforts and accomplishments, my salary is satisfactory.</i>                                                                             | Strongly disagree (0); Disagree (0); Agree (1); Strongly agree (2) |                                                                                                                                                                                  |
| <i>M. My colleagues facilitate the execution of my work.</i>                                                                                               | Strongly disagree (0); Disagree (0); Agree (1); Strongly agree (2) | <b>Support from the colleagues.</b><br>Sum of responses to items M and N (scale from 0 to 2)<br>High level: score = 2<br>Low or moderate level: score 0 or 1                     |
| <i>N. At my job, I feel like I'm part of a team.</i>                                                                                                       | Strongly disagree (0); Disagree (0); Agree (1); Strongly agree (2) |                                                                                                                                                                                  |
| <i>O. My immediate supervisor facilitates the execution of my work.</i>                                                                                    | Strongly disagree (0); Disagree (0); Agree (1); Strongly agree (2) | <b>Support from the supervisor.</b><br>Sum of the responses to items O and P (scale from 0 to 2)<br>High level: score = 2<br>Low or moderate level: score 0 or 1                 |
| <i>P. My immediate supervisor pays attention to what I say.</i>                                                                                            | Strongly disagree (0); Disagree (0); Agree (1); Strongly agree (2) |                                                                                                                                                                                  |
| <i>The questions below relate to your assessment of your current MAIN employment:</i>                                                                      |                                                                    |                                                                                                                                                                                  |

| Items and Questions                                                                                                                                                                                               | Choice of answers and score assigned to each answer                                                                                                                                                 | Construction of indicators                                                                                                                                                                |
|-------------------------------------------------------------------------------------------------------------------------------------------------------------------------------------------------------------------|-----------------------------------------------------------------------------------------------------------------------------------------------------------------------------------------------------|-------------------------------------------------------------------------------------------------------------------------------------------------------------------------------------------|
| A. <i>I have the means to do a quality job.</i>                                                                                                                                                                   | Never; Sometimes; Often; Always                                                                                                                                                                     | <b>Not having the means to do quality work.</b><br>Yes: Answers never, sometimes or often                                                                                                 |
| B. <i>I was forced to work in a way that offended my professional conscience.</i>                                                                                                                                 | Never; Sometimes; Often; Always                                                                                                                                                                     | <b>Forced to work in ways that offend their professional conscience.</b><br>Yes: Answers sometimes, often or always                                                                       |
| <b>C. Work-Life Balance:</b> <i>How easy or difficult is it for you to maintain a balance between your work obligations and your personal or family responsibilities?</i>                                         | Very easy; Easy; Neither easy nor difficult; Difficult; Very difficult; Don't know; Don't answer                                                                                                    | <b>Difficulty balancing work and personal life.</b><br>Yes: Difficult or very difficult answers to the question                                                                           |
| <b>2. Psychological distress</b>                                                                                                                                                                                  |                                                                                                                                                                                                     |                                                                                                                                                                                           |
| <i>Over the last month, how often did you feel...</i>                                                                                                                                                             |                                                                                                                                                                                                     |                                                                                                                                                                                           |
| A. <i>nervous?</i>                                                                                                                                                                                                | Never; Rarely; Sometimes; Most of the time; All the time; Don't know; Don't answer                                                                                                                  | <b>Psychological distress.</b><br>Sum of responses provided to questions A through F (0-4 points per question).<br>High distress = score $\geq 7$<br>Very high distress = score $\geq 13$ |
| B. <i>desperate?</i>                                                                                                                                                                                              | Never; Rarely; Sometimes; Most of the time; All the time; Don't know; Don't answer                                                                                                                  |                                                                                                                                                                                           |
| C. <i>agitated or unable to stay put?</i>                                                                                                                                                                         | Never; Rarely; Sometimes; Most of the time; All the time; Don't know; Don't answer                                                                                                                  |                                                                                                                                                                                           |
| D. <i>so depressed that nothing could make you smile?</i>                                                                                                                                                         | Never; Rarely; Sometimes; Most of the time; All the time; Don't know; Don't answer                                                                                                                  |                                                                                                                                                                                           |
| E. <i>that everything was an effort (so much tired that everything requires an effort)?</i>                                                                                                                       | Never; Rarely; Sometimes; Most of the time; All the time; Don't know; Don't answer                                                                                                                  |                                                                                                                                                                                           |
| F. <i>worthless?</i>                                                                                                                                                                                              | Never; Rarely; Sometimes; Most of the time; All the time; Don't know; Don't answer                                                                                                                  |                                                                                                                                                                                           |
| Link with the work: <i>Do you believe that the feelings of last month are related to your current (main) employment?</i>                                                                                          | Completely related to my current (main) employment; Partially related to my current (main) employment most of the time; No at all related to my current (main) employment; Don't know; Don't answer | <b>Work-related distress:</b> if the participant answers completely or partially related to my current job.                                                                               |
| <b>3. Sociodemographic and employment variables</b>                                                                                                                                                               |                                                                                                                                                                                                     |                                                                                                                                                                                           |
| Age                                                                                                                                                                                                               | Number of years                                                                                                                                                                                     |                                                                                                                                                                                           |
| Gender                                                                                                                                                                                                            | M; F                                                                                                                                                                                                |                                                                                                                                                                                           |
| Ethnicity: <i>Which of the following category describes you best?</i>                                                                                                                                             | Aboriginal (First Nations, Inuit, Métis); Caucasian; Asian; Black; Arab; Hispanic; Other category; Don't know; Prefer not to answer                                                                 |                                                                                                                                                                                           |
| Family composition: <i>Other than you, how many adults (18 years old or older) live with you??</i><br><i>How many children (less than 18 years old) live with you (including the children in shared custody)?</i> | Number of adults and number of children                                                                                                                                                             |                                                                                                                                                                                           |
| Type of employment: <i>What is the main position that you hold in the healthcare system?</i>                                                                                                                      | Drop-down menu                                                                                                                                                                                      |                                                                                                                                                                                           |

| Items and Questions                                                                                                                             | Choice of answers and score assigned to each answer | Construction of indicators                                                  |
|-------------------------------------------------------------------------------------------------------------------------------------------------|-----------------------------------------------------|-----------------------------------------------------------------------------|
| Facility: <i>In what kind of facility did you mostly work during the 14 days before the onset of your illness?</i>                              | Drop-down menu                                      |                                                                             |
| <b>4. Perceptions of the risk factors and protection factors in the workplace</b>                                                               |                                                     |                                                                             |
| Risk of COVID-19: <i>Since July 12, 2021, before getting sick, what was, in your opinion, your risk of catching COVID-19 in your workplace?</i> | Low; Moderate; High; Very high.                     |                                                                             |
| <i>How would you assess the following factors in terms of COVID-19 prevention in your workplace at the moment?</i>                              |                                                     |                                                                             |
| A. <i>The personal protection equipment (mask, eye protection/visor, gown, gloves) is available and easy to access.</i>                         | Strongly disagree; Disagree; Agree; Strongly agree  | Agree = Agree or Strongly agree<br>Disagree = Disagree or Strongly disagree |
| B. <i>I have good training in COVID-19 prevention, which allows me to protect myself well.</i>                                                  | Strongly disagree; Disagree; Agree; Strongly agree  |                                                                             |
| C. <i>My training included practical exercises on using personal protection equipment</i>                                                       | Strongly disagree; Disagree; Agree; Strongly agree  |                                                                             |
| D. <i>I easily get the information that allows me to know who are the patients with COVID-19 or suspected to have COVID-19.</i>                 | Strongly disagree; Disagree; Agree; Strongly agree  |                                                                             |
| E. <i>The access to COVID-19 screening tests and to their result is easy for healthcare workers.</i>                                            | Strongly disagree; Disagree; Agree; Strongly agree  |                                                                             |
| F. <i>The location and the layout of the furniture allow for a distancing of two meters with the other workers during breaks and meals.</i>     | Strongly disagree; Disagree; Agree; Strongly agree  |                                                                             |
| G. <i>The human resources are sufficient to provide the patient care and ensure the safety of the workers</i>                                   | Strongly disagree; Disagree; Agree; Strongly agree  |                                                                             |
